# Supplementary material for: Hydrogen generation from reactions of hydrides with hydrated solids in the solid state
Source: Royal Society of Chemistry journal article supplement (doi:10.1039/c6ra04410g), 2016-01-01
Supplement: c6ra04410g1.pdf [file c6ra04410g1.pdf]

## Supporting information

### Hydrogen generation from reactions of hydrides with hydrated solids in the solid state

Jun Chen, Cong Wang, Yong Wu, He Fu, Jie Zheng and Xingguo Li\*

*Beijing National Laboratory for Molecular Sciences (BNLMS), College of Chemistry and Molecular Engineering, Peking University, Beijing 100871, China*

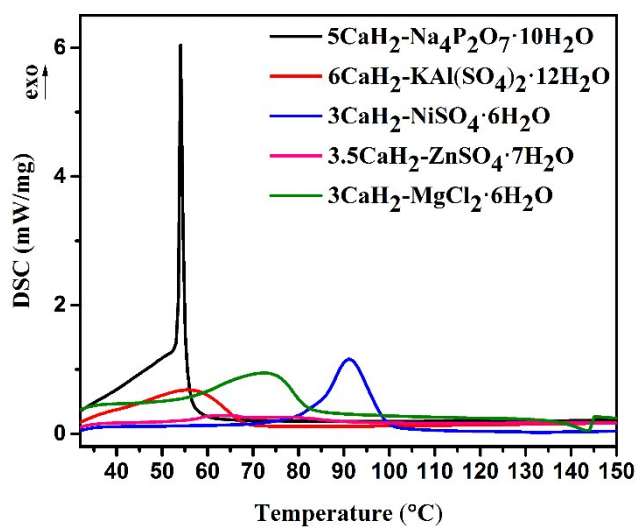

Figure S1 DSC profiles of the composites  $5\text{CaH}_2\text{-Na}_4\text{P}_2\text{O}_7\cdot 10\text{H}_2\text{O}$ ,  $6\text{CaH}_2\text{-KAl(SO}_4)_2\cdot 12\text{H}_2\text{O}$ ,  $3\text{CaH}_2\text{-NiSO}_4\cdot 6\text{H}_2\text{O}$ ,  $3.5\text{CaH}_2\text{-ZnSO}_4\cdot 7\text{H}_2\text{O}$  and  $3\text{CaH}_2\text{-MgCl}_2\cdot 6\text{H}_2\text{O}$ .
